# Supplementary material for: Effect of Saxagliptin on Renal Outcomes in the SAVOR-TIMI 53 Trial
Source: Oxford University Press journal article supplement (doi:10.2337/dc16-0621), 2016-10-17
Supplement: dc160621supplementarydata.pdf [file dc160621supplementarydata.pdf]

SUPPLEMENTARY DATA

**Effect of Saxagliptin on Renal Outcomes in the SAVOR TIMI-53 study-  
Appendixes:**

**Supplementary Appendix Table 1. Number and % of patients at the saxagliptin and placebo arms, according to eGFR and on treatment ACR groups at baseline, 1 year, and EOT**

| n<br>(% from ACR<br>by treatment<br>arm) | eGFR>50 ml/min/BSA |                 |                 |                 |               |               |
|------------------------------------------|--------------------|-----------------|-----------------|-----------------|---------------|---------------|
|                                          | ACR<30 Mg/G        |                 | 30≤ACR≤300 Mg/G |                 | ACR>300 Mg/G  |               |
|                                          | saxagliptin        | placebo         | saxagliptin     | placebo         | saxagliptin   | placebo       |
| <b>baseline</b>                          | 4365<br>(65.3%)    | 4326<br>(65.2%) | 1805<br>(27.0%) | 1819<br>(27.4%) | 513<br>(7.7%) | 491<br>(7.4%) |
| <b>1 year</b>                            | 3847<br>(68.7%)    | 3566<br>(65.3%) | 1333<br>(23.8%) | 1454<br>(26.6%) | 418<br>(7.5%) | 442<br>(8.1%) |
| <b>EOT</b>                               | 3311<br>(65.8%)    | 3063<br>(62.9%) | 1328<br>(26.4%) | 1379<br>(28.3%) | 390<br>(7.8%) | 427<br>(8.8%) |

| n<br>(% from ACR<br>by treatment<br>arm) | 30≤eGFR≤50 ml/min/BSA |                |                 |                |                |                |
|------------------------------------------|-----------------------|----------------|-----------------|----------------|----------------|----------------|
|                                          | ACR<30 Mg/G           |                | 30≤ACR≤300 Mg/G |                | ACR>300 Mg/G   |                |
|                                          | saxagliptin           | placebo        | saxagliptin     | placebo        | saxagliptin    | placebo        |
| <b>baseline</b>                          | 470<br>(44.0%)        | 474<br>(44.8%) | 362<br>(33.9%)  | 346<br>(32.7%) | 237<br>(22.2%) | 239<br>(22.6%) |
| <b>1 year</b>                            | 357<br>(42.9%)        | 369<br>(46.2%) | 313<br>(37.6%)  | 253<br>(31.7%) | 162<br>(19.5%) | 177<br>(22.2%) |
| <b>EOT</b>                               | 295<br>(41.7%)        | 279<br>(41.0%) | 265<br>(37.5%)  | 230<br>(33.8%) | 147<br>(20.8%) | 172<br>(25.3%) |

| n<br>(% from ACR<br>by treatment<br>arm) | eGFR<30 ml/min/BSA |               |                 |               |               |               |
|------------------------------------------|--------------------|---------------|-----------------|---------------|---------------|---------------|
|                                          | ACR<30 Mg/G        |               | 30≤ACR≤300 Mg/G |               | ACR>300 Mg/G  |               |
|                                          | saxagliptin        | placebo       | saxagliptin     | placebo       | saxagliptin   | placebo       |
| <b>baseline</b>                          | 32<br>(19.5%)      | 29<br>(19.5%) | 50<br>(30.5%)   | 44<br>(29.5%) | 82<br>(50.0%) | 76<br>(51.0%) |
| <b>1 year</b>                            | 23<br>(19.2%)      | 26<br>(23.2%) | 47<br>(39.2%)   | 28<br>(25.0%) | 50<br>(41.7%) | 58<br>(51.8%) |
| <b>EOT</b>                               | 20<br>(19.6%)      | 18<br>(20.5%) | 39<br>(38.2%)   | 27<br>(30.7%) | 43<br>(42.2%) | 43<br>(48.9%) |

(Abbreviations: BSA Body Surface area per 1.73 m<sup>2</sup>)

SUPPLEMENTARY DATA

**Supplementary Appendix Table 2. Multivariable Analysis of the association between baseline variables and ACR and eGFR as continuous variable at baseline**

| Variable*                                                                                              | Multivariable Modeling for log(ACR)<br>(mg/g) at baseline |                    |         | Multivariable Modeling for eGFR<br>(mL/min/BSA) at baseline |                    |         |
|--------------------------------------------------------------------------------------------------------|-----------------------------------------------------------|--------------------|---------|-------------------------------------------------------------|--------------------|---------|
|                                                                                                        | Coefficient                                               | 95% CI             | P-value | Coefficient                                                 | 95% CI             | P-value |
| Age (increase by a year)                                                                               | 0.0015                                                    | (-0.0019, 0.0050)  | 0.3855  | -0.7425                                                     | (-0.7838, -0.7011) | <.0001  |
| Sex (Male vs. Female)                                                                                  |                                                           | NS                 |         | 5.0366                                                      | (4.3397, 5.7334)   | <.0001  |
| Race (Caucasian vs. all other)                                                                         | -0.3712                                                   | (-0.4348, -0.3076) | <.0001  | -0.7842                                                     | (-1.5914, 0.0230)  | 0.0569  |
| Hispanic or Latino (vs. not)                                                                           | 0.3113                                                    | (0.2456, 0.3770)   | <.0001  | 3.0296                                                      | (2.2090, 3.8501)   | <.0001  |
| BMI (kg/m <sup>2</sup> )                                                                               |                                                           | NS                 |         | -0.2121                                                     | (-0.2735, -0.1506) | <.0001  |
| Duration of diabetes (for each extra year)                                                             | 0.0184                                                    | (0.0151, 0.0218)   | <.0001  | -0.1087                                                     | (-0.1497, -0.0677) | <.0001  |
| Current smoker                                                                                         |                                                           | NS                 |         | 3.1464                                                      | (2.1880, 4.1049)   | <.0001  |
| History of CVD                                                                                         | 0.2050                                                    | (0.1411, 0.2689)   | <.0001  | -1.4584                                                     | (-2.2857, -0.6311) | 0.0005  |
| HbA1C% (unit increase in HbA1c)                                                                        | 0.1857                                                    | (0.1618, 0.2097)   | <.0001  | 0.4320                                                      | (0.1374, 0.7266)   | 0.0041  |
| Fasting PG (mg/dl for each unit increase)                                                              | 0.0010                                                    | (0.0005, 0.0016)   | 0.0003  | 0.0179                                                      | (0.0109, 0.0248)   | <.0001  |
| eGFR (ml/min/BSA)                                                                                      | -0.0151                                                   | (-0.0164, -0.0138) | <.0001  |                                                             |                    |         |
| ACR (analyzed on a log scale for each percentage point increase for the ACR, the GFR decreases by 2.7) |                                                           | NA                 |         | -2.3757                                                     | (-2.5662, -2.1851) | <.0001  |
| ACE inhibitors                                                                                         | 0.0780                                                    | (0.0157, 0.1403)   | 0.0141  |                                                             | NS                 |         |
| ARBs                                                                                                   | 0.2455                                                    | (0.1764, 0.3146)   | <.0001  | -1.8087                                                     | (-2.5251, -1.0924) | <.0001  |
| B-Blockers                                                                                             |                                                           | NS                 |         | -2.9851                                                     | (-3.6860, -2.2841) | <.0001  |
| Statin                                                                                                 |                                                           | NS                 |         | -1.0403                                                     | (-1.8543, -0.2264) | 0.0122  |
| Aspirin                                                                                                |                                                           | NS                 |         |                                                             | NS                 |         |
| Sulfonylurea                                                                                           | -0.0303                                                   | (-0.0881, 0.0276)  | 0.3055  | -0.9703                                                     | (-1.6753, -0.2654) | 0.0070  |
| Metformin                                                                                              | -0.0340                                                   | (-0.0943, 0.0262)  | 0.2687  | 7.8730                                                      | (7.1487, 8.5973)   | <.0001  |
| Insulin                                                                                                | 0.2701                                                    | (0.2045, 0.3356)   | <.0001  | -1.6524                                                     | (-2.4561, -0.8488) | <.0001  |
| Thiazolidinediones                                                                                     | -0.0571                                                   | (-0.1682, 0.054)   | 0.3138  |                                                             | NS                 |         |

(Abbreviations: BSA Body Surface area **per 1.73 m<sup>2</sup>**)

SUPPLEMENTARY DATA

**Supplementary Appendix Table 3. Change in categorical ACR (<15mg/g, ≥15 and<30 mg/g, 30-<100 mg/g, 100-300 mg/g, >300 mg/g) from baseline to EOT by baseline ACR categories and treatment arms**

|                        |                        | ACR (Mg/G) at EOT |              |              |              |              |               |              |              |              |              |
|------------------------|------------------------|-------------------|--------------|--------------|--------------|--------------|---------------|--------------|--------------|--------------|--------------|
|                        |                        | SAXAGLIPTIN       |              |              |              |              | PLACEBO       |              |              |              |              |
|                        |                        | <15               | ≥15-<30      | ≥30-<100     | ≥100-≤300    | >300         | <15           | ≥15-<30      | ≥30-<100     | ≥100-≤300    | >300         |
| ACR (Mg/G) at baseline | <15<br>P*= 0.019       | 2204<br>75.5%     | 410<br>14.0% | 246<br>8.4%  | 43<br>1.5%   | 17<br>0.6%   | 2056<br>72.8% | 447<br>15.8% | 247<br>8.7%  | 60<br>2.1%   | 15<br>0.5%   |
|                        | ≥15-<30<br>P**= 0.090  | 323<br>39.2%      | 215<br>26.1% | 219<br>26.6% | 47<br>5.7%   | 19<br>2.3%   | 273<br>33.5%  | 217<br>26.6% | 260<br>31.9% | 50<br>6.1%   | 16<br>2.0%   |
|                        | ≥30-<100<br>P**<0.001  | 193<br>18.5%      | 181<br>17.4% | 434<br>41.6% | 184<br>17.6% | 51<br>4.9%   | 144<br>14.5%  | 159<br>16.1% | 395<br>39.9% | 205<br>20.7% | 87<br>8.8%   |
|                        | ≥100-≤300<br>P**=0.043 | 38<br>7.3%        | 39<br>7.5%   | 137<br>26.4% | 174<br>33.6% | 130<br>25.1% | 25<br>4.9%    | 24<br>4.7%   | 136<br>26.4% | 168<br>32.6% | 162<br>31.5% |
|                        | >300<br>P***=0.049     | 13<br>2.4%        | 10<br>1.9%   | 45<br>8.4%   | 103<br>19.3% | 363<br>68.0% | 9<br>1.8%     | 6<br>1.2%    | 28<br>5.7%   | 87<br>17.7%  | 362<br>73.6% |

\*P-value is based on a two tailed normal distribution approximation test for the proportion of patients who worsened

\*\* P-value is based on a chi-squared test for independence

\*\*\*P-value is based on a two tailed normal distribution approximation test for the proportion of patients who improved

P-values were calculated for each level of ACR at baseline separately.

White: The number of patients (%) at each ACR category at baseline, with no change in ACR category to EOT.

Very Light Green: The number of patients (%) at each ACR category at baseline, with improvement in one ACR category to EOT.

Light Green: The number of patients (%) at each ACR category at baseline, with improvement in two ACR categories to EOT.

Moderate Green: The number of patients (%) at each ACR category at baseline, with improvement in three ACR categories to EOT.

Dark Green: The number of patients (%) at each ACR category at baseline, with improvement in four ACR categories to EOT.

SUPPLEMENTARY DATA

**Supplementary Appendix Figure 1. Percentage of patients at the different on treatment ACR (at Baseline, 1year and EOT) categories out of the patients at baseline eGFR category**

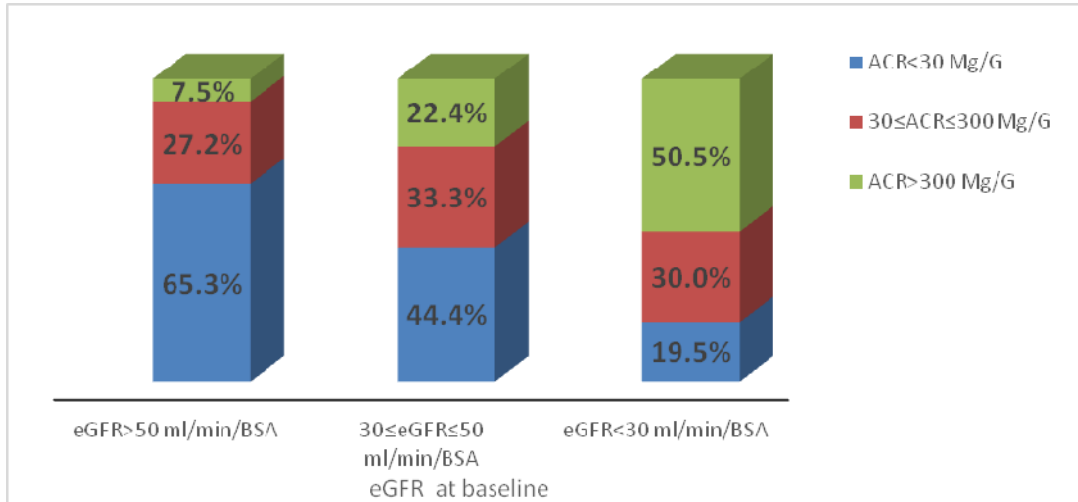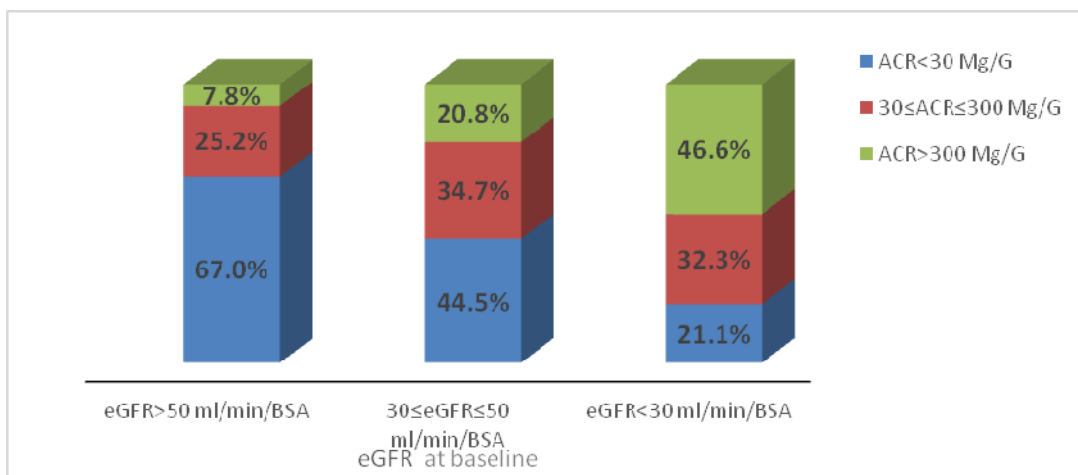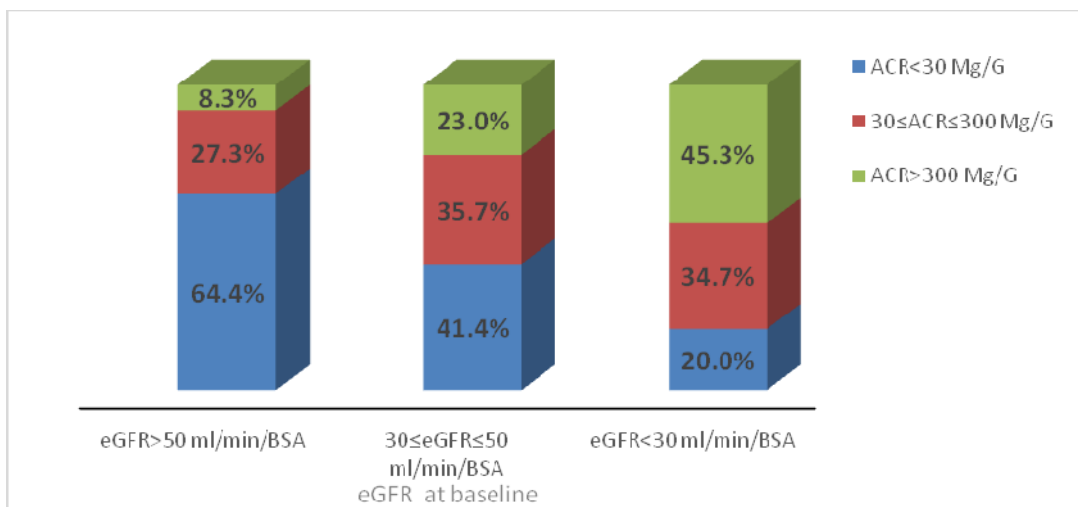

SUPPLEMENTARY DATA

**Supplementary Appendix Figure 2. Density charts for change of ACR from baseline to 1 year and EOT, by treatment arms\***

A- 1 year

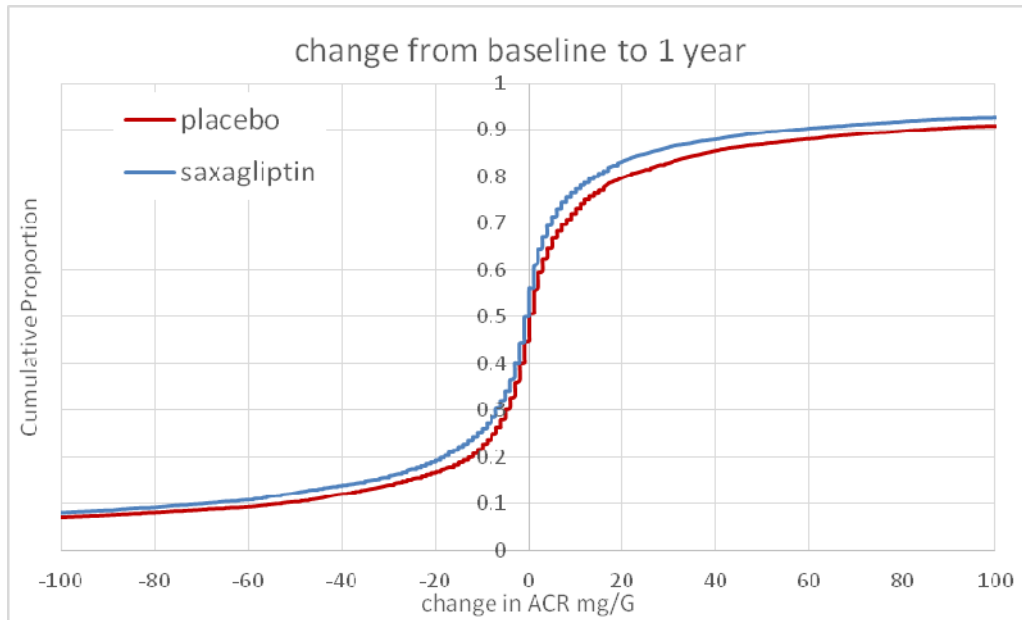

B- EOT

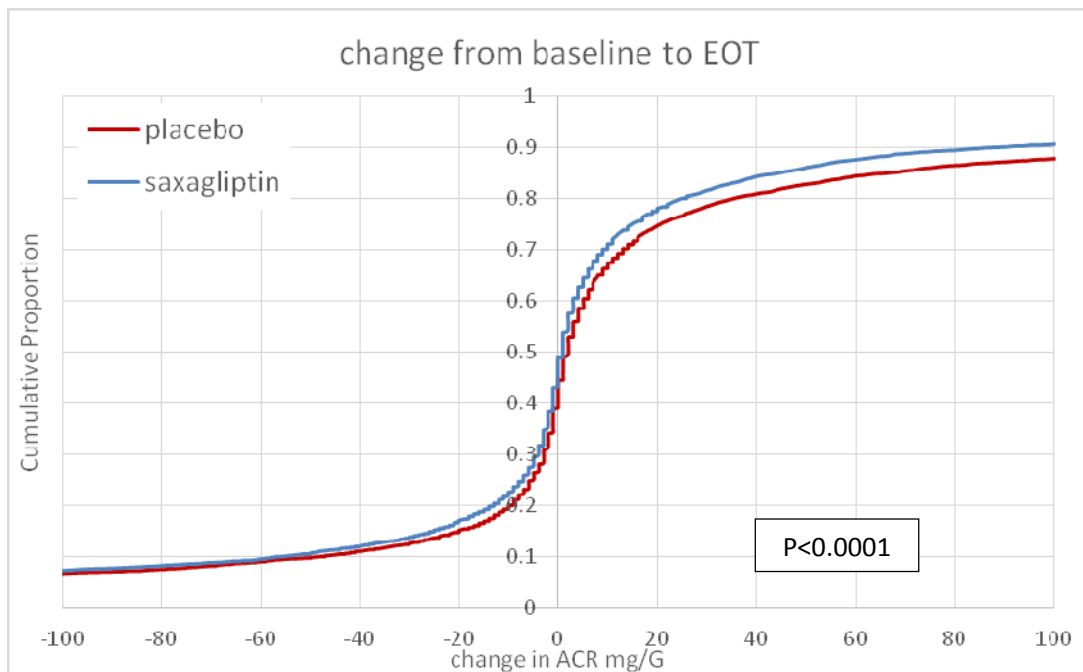

(For visualization purposes the graph was drawn with change in ACR values cut-off between -100 and 100)
